# Supplementary material
Source: PubMed Central journal article supplement (PMC5517016)
Supplement: NIHMS876204-supplement-supplement_1.pdf [file NIHMS876204-supplement-supplement_1.pdf]

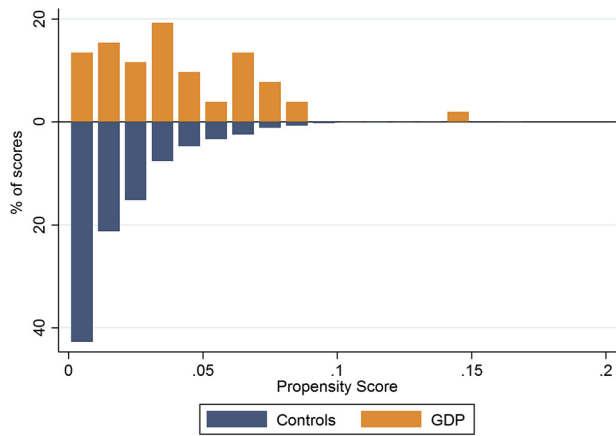

**FIGURE E1.** Mirror histogram showing distribution of propensity scores in GDP and control patients. *GDP*, Goal-directed perfusion.

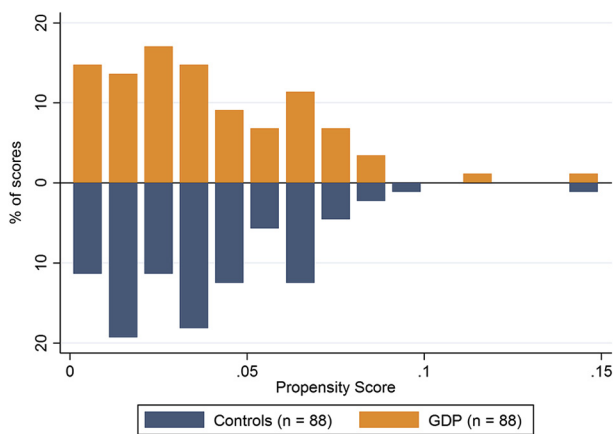

**FIGURE E2.** Mirror histogram showing distribution of propensity scores in GDP and control patients after matching. *GDP*, Goal-directed perfusion.
